# Supplementary material
Source: PubMed Central journal article supplement (PMC4344145)
Supplement: rspb20142302supp1.pdf [file rspb20142302supp1.pdf]

## Supplementary Information

### **1. Deriving values of scaling exponents of surface area versus body mass ( $b_A$ ) by applying Euclidean geometry to additional dimensional measurements in the study species**

Given a lack of strong systematic variation in mass-density during ontogeny, relative to size increase (Hirst 2012; Hirst et al 2014), we assume that during ontogeny mass ( $M$ )  $\propto$  Volume ( $V$ ). Values of  $b_L$  were calculated from length measurements along the long body axis, or from the diameter of oblate medusal forms, which all grew proportionately more by radial increase rather than by bell height increase (Hirst 2012).

Shape shifting or ‘classic geometric dissimilitude’ requires a minimum of three length scales,  $l_1, l_2, l_3$ , to define the general shape changes of three-dimensional objects (Okie 2013), which can be described thus:

$$l_2 \propto l_1^\theta \text{ and}$$

$$l_3 \propto l_1^\beta, \quad [1]$$

where  $l_1$  is the measured body length, and  $\beta \leq \theta \leq 1$ . Isomorphic growth yields  $\beta = \theta = 1$ ; sheet-like or planar growth with equal increase in just two dimensions, resulting in shape ‘flattening’, yields  $\beta = 0$ , and  $\theta = 1$ ; and pure body-length elongation yields  $\beta = \theta = 0$ .

$$\text{As } M \propto V \propto l_1 l_2 l_3 \propto l_1^{(\theta + \beta + 1)}$$

$$b_L = \theta + \beta + 1 \quad [2]$$

Using dimensional analysis, Okie (2013) showed that as aspect ratios ( $l_1/l_3$ ) increase with increasing size, scaling of surface area,  $A$ , on volume,  $V$ , converges on:

$$A \propto V^{(\theta+1)/(\theta+\beta+1)} \quad [3]$$

Hence, at the limit of growth to maximum aspect ratio, achieved from minimum initial values of  $l_2$  and  $l_3$ ,

$$b_A = (\theta + 1)/(\theta + \beta + 1) \quad [4]$$

Using equations 2 and 4, and the changing values of  $\theta$  and  $\beta$  when growth changes from isomorphy to pure elongation and to pure two-dimensional or planar growth, Hirst et al (2014) derived three boundaries that contain the complete set of predicted  $b_A$  values when  $b_L \leq 3$ , and using a similar approach to derive boundaries for growth that yields  $b_L \geq 3$ . These boundaries are shown in Fig. 1 of the text.

Extending this derivation, it is straightforward to narrow down the range of predicted values of  $b_A$  to a single number. Thus, if we have an estimate of how  $l_2$  (e.g., body width) scales with  $l_1$  (i.e., a value for  $\theta$ ), Equation 2 can be substituted into the denominator of Equation 4 to get

$$b_A = (\theta + 1)/b_L$$

This method is used to predict values of  $b_A$  from the following data plus  $b_L$  values in Table 1 (also see SI section 2).

### Key to data:

$l_1/l_2$  = body length to width ratio

$\theta$  = scaling exponent obtained as slope in least squares regression of  $\log_{10} l_2$  vs.  $\log_{10} l_1$ , which are on the Y and X axes, respectively (except in one case for the veliger larvae of *Mytilus edulis*, where  $\theta = 1$  based on a regression of  $l_1$  vs.  $l_2$ ; see below).

Error terms ( $\pm$ ) = 95% confidence intervals

$r^2$  = coefficient of determination

n = sample size

**Calculated values are in bold.**

| <u>Species</u>           | <u>Measurements and calculation of <math>b_A</math></u>                                                                                                                                                                                                                                                                                                        | <u>Source</u>                                                          |
|--------------------------|----------------------------------------------------------------------------------------------------------------------------------------------------------------------------------------------------------------------------------------------------------------------------------------------------------------------------------------------------------------|------------------------------------------------------------------------|
| <i>Beroe ovata</i>       | Newly hatched larvae (0.4mm L):<br>$l_1/l_2 = 1.25$                                                                                                                                                                                                                                                                                                            | Svetlichny et al. (2004)                                               |
|                          | Juveniles (1-2cm L)<br>$l_1/l_2 = 1.34$<br><b><math>\theta = 0.95</math>, <math>b_A = 0.67</math></b>                                                                                                                                                                                                                                                          |                                                                        |
|                          | Adults<br>$\theta = 0.939 \pm 0.044$ ; $r^2 = 0.997$ ; n = 10<br>(each sample point = midpoint of range given in Table 1 of source; based on measurements of 58 animals);<br>$l_1 = 19-120.5\text{mm}$ ; $l_2 = 17.25-96.5\text{mm}$<br><b><math>b_L = 2.16</math></b> (average of values in Table 1; also see SI section 2)<br><b><math>b_A = 0.90</math></b> | Shiganova et al. (2007)                                                |
| <i>Aurelia aurita</i>    | Radial diameter used for both ephyrae & medusae. Therefore, we can assume that $l_1 = l_2$ , <b>and <math>\theta = 1</math></b> ,<br><b>and <math>b_A = 0.64</math> for ephyrae</b><br><b>and <math>b_A = 0.77</math> for medusae</b>                                                                                                                          | Båmstedt et al. (1999)<br>McHenry & Jed (2003)<br>Hirst & Lucas (1998) |
| <i>Crassostrea gigas</i> | $\theta =$ scaling exponent for velar length vs. shell length in veliger larvae = 1.01 (high food: $r^2 = 0.87$ ; n = 30) and 1.01 (low food: $r^2 = 0.92$ , n = 37); velar length is assumed to be $l_2$ , because it is essentially perpendicular to shell length ( $l_1$ ).<br><b><math>b_A = 0.95</math></b>                                               | Strathmann et al. (1993)                                               |
| <i>Mytilus edulis</i>    | Veliger larvae<br>$\theta = 1$ ; $r^2 = 0.974$ ; n = 1616;<br>$l_1 = \sim 140-300\mu\text{m}$ ; $l_2 = \sim 100-260\mu\text{m}$<br><b><math>b_A = 0.57</math></b>                                                                                                                                                                                              | Pechenik et al. (1990)                                                 |

*Sagmariasus verreauxi* Phyllosoma larvae Jensen et al. (2013b)  
 $\theta \approx \mathbf{0.954}$  (high food): based on  $b = 1.45$  for  
 log  $l_2$  vs. log instar stage, and  $b = 1.52$  for  
 log  $l_1$  vs. log instar stage  
 $\theta \approx \mathbf{0.937}$  (low food): based on  $b = 1.48$  for  
 log  $l_2$  vs. log instar stage, and  $b = 1.58$  for  
 log  $l_1$  vs. log instar stage  
**Mean  $\theta = 0.946$**   
 **$b_A = 0.91$**

### Data sources:

Båmstedt U, Lane J, Martinussen MB. 1999 Bioenergetics of ephyra larvae of the scyphozoan jellyfish *Aurelia aurita* in relation to temperature and salinity. *Mar. Biol.* **135**, 89-98. (doi:10.1007/s002270050605)

Hirst AG, Lucas CH. 1998 Salinity influences body weight quantification in the scyphomedusa *Aurelia aurita*: important implications for body weight determination in gelatinous zooplankton. *Mar. Ecol. Progr. Ser.* **165**, 259-269. (doi:10.3354/meps165259)

Jensen MA, Fitzgibbon QP, Carter CG, Adams LR. 2013b The effect of stocking density on growth, metabolism and ammonia-N excretion during larval ontogeny of the spiny lobster *Sagmariasus verreauxi*. *Aquaculture* **376-379**, 45-53. (doi.org/10.1016/j.aquaculture.2012.10.033)

McHenry MJ, Jed J. 2003 The ontogenetic scaling of hydrodynamics and swimming performance in jellyfish (*Aurelia aurita*). *J. Exp. Biol.*, **206**, 4125-4137. (doi:10.1242/jeb.00649)

Pechenik JA, Eyster LS, Widdows J, Bayne BL. 1990 The influence of food concentration and temperature on growth and morphological differentiation of blue mussel *Mytilus edulis* L. larvae. *J. Exp. Mar. Biol. Ecol.* **136**, 41-64. (doi.org/10.1016/0022-0981(90)90099-X)

Shiganova TA, Christou ED, Siokou-Frangou I. 2007 First recording of the non-native species *Beroe ovata* Mayer 1912 in the Aegean Sea. *Medit. Mar. Sci.* **8**, 5-15. (doi:10.12681/mms.159)

Strathmann RR, Fenaux L, Sewell AT, Strathmann F. 1993 Abundance of food affects relative size of larval and postlarval structures of a molluscan veliger. *Biol. Bull.* **185**, 232-239. (<http://www.jstor.org/stable/1542003>)

Svetlichny LS, Abolmasova GI, Hubareva ES, Finenko GA, Bat, L, Kideys AE. 2004 Respiration rates of *Beroe ovata* in the Black Sea. *Mar. Biol.* **145**, 585-593. (doi:10.1007/s00227-004-1336-4)

### Other cited references:

Hirst AG. 2012 Intra-specific scaling of mass to length in pelagic animals: Ontogenetic shape change and its implications. *Limnol. Oceanogr.* **57**, 1579-1590. (doi:10.4319/lo.2012.57.5.1579)

Hirst AG, Glazier DS, Atkinson D. 2014 Body shape shifting during growth permits tests that distinguish between competing geometric theories of metabolic scaling. *Ecol. Lett.* (doi:10.1111/ele.12334)

Okie JG. 2013 General models for the spectra of surface area scaling strategies of cells and organisms: fractality, geometric dissimilitude, and internalization. *Am. Nat.* **181**, 421-439. (doi:10.1086/669150)

## 2. Additional data and sources for Table 1

Shown are ontogenetic scaling exponents from least squares regressions of  $\log_{10}$  body mass in relation to  $\log_{10}$  body length ( $b_L$ ) and  $\log_{10}$  routine metabolic rate in relation to  $\log_{10}$  body mass ( $b_R$ ) for larvae, juveniles, and (or) adults of the Atlantic ctenophore *Beroe ovata*, moon jellyfish *Aurelia aurita*, Pacific oyster *Crassostrea gigas*, common mussel *Mytilus edulis* and spiny lobster *Sagmariasus verreauxi*; for nauplii, copepodites and adults of the copepod *Mesocyclops brasiliensis*; and for solitary and aggregate life-cycle stages of the salps (pelagic tunicates) *Salpa fusiformis* and *S. thompsoni*. Values of  $b_L$  and  $b_R$  were taken or calculated from published or unpublished data in the indicated sources. Values of  $b_A$  for  $\log_{10}$  body surface area in relation to  $\log_{10}$  body mass were estimated from  $b_L$  values and scaling exponents of width versus length (SI section 1). When data for scaling of width versus length were not available, ranges of potential  $b_A$  values are given (based on equations 3.1 and 3.2 in text). Where available, the 95% confidence intervals (CI), coefficient of determination ( $r^2$ ), sample size (n) and the body length (L), diameter (D) or mass (M) range for each scaling exponent are given.

| species               | stage            | $b_L$<br>±95% CI<br>( $r^2$ , n,<br>L, D or M range) | $b_A$                                   | $b_R$<br>±95% CI<br>( $r^2$ , n,<br>L, D or M range)                  | sources                  |
|-----------------------|------------------|------------------------------------------------------|-----------------------------------------|-----------------------------------------------------------------------|--------------------------|
| <i>Beroe ovata</i>    | juveniles        | 2.92 <sup>1</sup><br>(0.99, 21,<br>L=0.4-4.0mm)      | <b>0.67</b><br>(0.67-0.68)              | <b>0.62</b> <sup>1,2</sup><br>(M=0.021-100mg)                         | Svetlichny et al. (2004) |
|                       | adults           | 2.47 <sup>1</sup><br>(0.96, 102,<br>L=4.0-66mm)      | <b>0.80</b><br>(0.70-0.81)              | <b>0.99</b> <sup>1,3</sup><br>(M=0.1-55g)                             | Svetlichny et al. (2004) |
|                       | adults           | 2.23 <sup>1</sup><br>(0.98, 22<br>L=14-120mm)        | <b>0.87</b><br>(0.72-0.90)              | <b>1.04</b> <sup>4</sup><br>(0.98, 17,<br>M=0.01-0.9g)                | Finenko et al. (2001)    |
|                       | adults           | 1.78 <sup>1</sup><br>(0.79, 43<br>L=16-162mm)        | <b>1.09</b> <sup>5</sup><br>(0.78-1.00) | <b>0.86</b> <sup>1</sup><br>(0.78, 21,<br>M=8-58g)                    | Shiganova et al. (2001)  |
| <i>Aurelia aurita</i> | ephyra<br>larvae | 3.14 <sup>4,6</sup><br>(0.64, 132,<br>D=3.7-8.8mm)   | <b>0.64</b> <sup>7</sup><br>(0.64-0.66) |                                                                       | Båmstedt et al. (1999)   |
|                       | ephyra<br>larvae |                                                      |                                         | <b>0.63</b> <sup>4,8</sup><br>±0.055<br>(0.96, 29,<br>M=0.066-12.4mg) | Kinoshita et al. (1997)  |

|                          |                |                                                            |                                                                     |                                                          |                          |
|--------------------------|----------------|------------------------------------------------------------|---------------------------------------------------------------------|----------------------------------------------------------|--------------------------|
|                          | ephyra larvae  |                                                            | <b>0.35<sup>4</sup></b><br>±0.104<br>(0.78, 16,<br>M=0.4-7.2mg)     | Frandsen & Riisgard (1997): raw data                     |                          |
|                          | ephyra larvae  |                                                            | <b>1.01<sup>4</sup></b><br>(0.97, 6,<br>M=0.2-0.9mg)                | Moller & Riisgard (2007)                                 |                          |
|                          | medusae        | 2.50 <sup>1,9</sup><br>±0.23<br>(0.94, 25,<br>D=30-100mm)  | <b>0.80</b><br>(0.70-0.80)                                          | McHenry & Jed (2003)                                     |                          |
|                          | medusae        | 2.72 <sup>1,9,10</sup><br>±0.11                            | <b>0.74</b><br>(0.68-0.74)                                          | Hirst & Lucas (1998)                                     |                          |
|                          |                |                                                            | <b>0.93<sup>4,8</sup></b><br>±0.07<br>(0.96, 26,<br>M=12.4-2,100mg) | Kinoshita et al. (1997)                                  |                          |
|                          | medusae        |                                                            | <b>1.11<sup>4</sup></b><br>±0.104<br>(0.90, 22,<br>M=11-1,790mg)    | Frandsen & Riisgard (1997): raw data                     |                          |
|                          | medusae        |                                                            | <b>1.01<sup>4</sup></b><br>(0.99, 6,<br>M=25-8,000mg)               | Moller & Riisgard (2007)                                 |                          |
| <hr/>                    |                |                                                            |                                                                     |                                                          |                          |
| <i>Crassostrea gigas</i> | veliger larvae | 2.12 <sup>11</sup><br>±0.21<br>(0.99, 10,<br>L=79-280.7µm) | <b>0.95</b><br>(0.74-0.94)                                          | <b>0.96<sup>11</sup></b><br>(0.97, 10<br>M=0.069-1.36µg) | Gerdes (1983)            |
|                          | adults         |                                                            |                                                                     | <b>0.77<sup>11</sup></b><br>(0.99, 36<br>M=0.03-1,741mg) | Gerdes (1983)            |
|                          | adults         | 2.79 <sup>11,12</sup><br>±0.14<br>(L=10-100mm)             | <b>0.68-0.72</b>                                                    |                                                          | Gangnery et al. (2003)   |
| <hr/>                    |                |                                                            |                                                                     |                                                          |                          |
| <i>Mytilus edulis</i>    | veliger larvae | 3.49 <sup>11</sup><br>(0.99, 32,<br>L=90-410µm)            | <b>0.57<sup>13</sup></b><br>(0.57-0.71)                             |                                                          | Jespersen & Olsen (1982) |
|                          | veliger        |                                                            | <b>0.90<sup>11</sup></b>                                            |                                                          | Hamburger et al. (1983)  |

|                                                |                         |                                                                                            |                            |                                                                                                                                                |                                                 |
|------------------------------------------------|-------------------------|--------------------------------------------------------------------------------------------|----------------------------|------------------------------------------------------------------------------------------------------------------------------------------------|-------------------------------------------------|
|                                                | larvae                  |                                                                                            |                            | (0.73, 29,<br>$M \sim -0.02-1\mu\text{g}$ )                                                                                                    |                                                 |
|                                                | veliger<br>larvae       |                                                                                            |                            | <b>0.90</b> <sup>11</sup> (6° C)<br>(n = 31)<br><b>0.70</b> <sup>11</sup> (12° C)<br>(n = 32)<br><b>0.59</b> <sup>11</sup> (18° C)<br>(n = 33) | Sprung (1984)<br>Sprung (1984)<br>Sprung (1984) |
|                                                | juveniles               | 2.42 <sup>11</sup><br>(1.00, 11,<br>$L \sim -0.7-5\text{mm}$ )                             | <b>0.71-0.83</b>           |                                                                                                                                                | Jespersen & Olsen<br>(1982)                     |
|                                                | juveniles               |                                                                                            |                            | <b>0.89</b> <sup>11</sup><br>(0.97, 26,<br>$M \sim -0.001-7\text{mg}$ )                                                                        | Hamburger et al. (1983)                         |
|                                                | adults                  |                                                                                            |                            | <b>0.66</b> <sup>11</sup><br>(0.97, 21,<br>$M \sim -1.5-500\text{mg}$ )                                                                        | Hamburger et al. (1983)                         |
|                                                | adults                  | 3.17 <sup>14</sup><br>(n = 69)                                                             | <b>0.63-0.68</b>           | <b>0.68</b> <sup>14</sup><br>(n = 87)                                                                                                          | Zotin & Ozernyuk<br>(2004a, b)                  |
| <i>Sagmariasus<br/>verreauxi</i> <sup>15</sup> | phyllosoma<br>larvae    | 2.14 <sup>1, 16</sup><br>$\pm 0.26$<br>(0.99, 7 <sup>17</sup><br>$L = 2.0-35.7\text{mm}$ ) | <b>0.91</b><br>(0.73-0.93) | <b>1.00</b> <sup>1, 16</sup><br>$\pm 0.081$<br>(0.995, 7 <sup>17</sup><br>$M = 0.63-296\text{mg}$ )                                            | Jensen et al. (2013a, b)                        |
|                                                | juveniles               | 2.99 <sup>1, 16</sup><br>$\pm 0.037$<br>(1.00, 7 <sup>17</sup><br>$L = 99-363\text{mm}$ )  | <b>0.67</b>                | <b>0.83</b> <sup>1, 16</sup><br>$\pm 0.157$<br>(0.99, 7 <sup>17</sup><br>$M = 24.8-1,223\text{g}$ )                                            | Jensen et al. (2013a, b)                        |
| <i>Mesocyclops<br/>brasilianus</i>             | nauplii                 | 2.15 <sup>4</sup>                                                                          | <b>0.73-0.93</b>           | <b>1.08</b> <sup>4, 18</sup><br>$\pm 0.20$<br>(n = 30,<br>$M \sim -30-160\text{ng}$ )                                                          | Epp & Lewis (1979,<br>1980)                     |
|                                                | copepodites<br>& adults | 3.12 <sup>4, 19</sup>                                                                      | <b>0.64-0.68</b>           | <b>0.56</b> <sup>4, 20</sup><br>$\pm 0.078$<br>(n = 88,<br>$M \sim -175-2,500\text{ng}$ )                                                      | Epp & Lewis (1979,<br>1980)                     |
| <i>Salpa<br/>fusiformis</i>                    | solitary<br>zooids      | 2.40 <sup>21</sup><br>(0.96, 7,<br>$L = 23-45\text{mm}$ )                                  | <b>0.71-0.83</b>           | <b>1.15</b> <sup>21</sup><br>(0.95, 10<br>$M = 0.6-8.5\text{mg}$ )                                                                             | Cetta et al. (1986)                             |

|                        |                  |                                                       |                  |                                                                          |                       |
|------------------------|------------------|-------------------------------------------------------|------------------|--------------------------------------------------------------------------|-----------------------|
|                        | aggregate zooids | 2.78 <sup>21</sup><br>(0.98, 12,<br>L=2-20mm)         | <b>0.68-0.72</b> | <b>0.68</b> <sup>21</sup><br>(0.90, 15,<br>M=0.3-10.1mg)                 | Cetta et al. (1986)   |
| <i>Salpa thompsoni</i> | solitary zooids  | 2.28 <sup>1, 16, 22</sup><br>(0.98, 6,<br>L=26-132mm) | <b>0.72-0.88</b> | <b>0.84</b> <sup>1, 16, 22</sup><br>±0.16<br>(0.98, 6,<br>M=0.94-34.9g)  | Iguchi & Ikeda (2004) |
|                        | aggregate zooids | 2.41 <sup>1, 16, 22</sup><br>(0.96, 31,<br>L=12-56mm) | <b>0.71-0.83</b> | <b>0.92</b> <sup>1, 16, 22</sup><br>±0.14<br>(0.89, 25,<br>M=0.26-15.2g) | Iguchi & Ikeda (2004) |

<sup>1</sup> Based on wet body mass

<sup>2</sup> Based on data from several studies all normalized to 20° C. Similar exponents were found at 21° C ( $b_R = 0.65$ ;  $r^2 = 0.93$ ;  $n = 25$ ;  $M$  range = 0.021-700mg) and at 26° C ( $b_R = 0.58$ ;  $r^2 = 0.96$ ;  $n = 14$ ;  $M$  range = 0.03-100mg)

<sup>3</sup> Based on data from several studies all normalized to 20° C. Similar exponents were found at 21° C ( $b_R = 1.078$ ;  $r^2 = 0.83$ ;  $n = 51$ ;  $M$  range = 700-55,000mg) and at 26° C ( $b_R = 1.044$ ;  $r^2 = 0.93$ ;  $n = 73$ ;  $M$  range = 100-50,000mg)

<sup>4</sup> Based on dry body mass

<sup>5</sup> It is not known why this calculated estimate of  $b_A$  is higher than the predicted range (in parentheses). Perhaps it is because body-mass density decreased during growth, thus causing  $b_L$  to be an underestimate of the scaling slope for body volume in relation to length.

<sup>6</sup> Based on outermost diameter, including the lappet tips.

<sup>7</sup> Accurately estimating the body-mass scaling of surface area in ephyra larvae is complicated because their shape changes considerably from being snowflake-like with long radiating projections (lappets) to umbrella-like, with little or no radiating projections [see Fig. 3 in Kinoshita et al. 2007; also see Fig. 1 in Feitl et al. 2009]

<sup>8</sup> Estimated at 15° C. Similar values were observed at 10° C

<sup>9</sup> Based on bell diameter

<sup>10</sup> Mean of 12 separate estimates. Mean for 7 dry mass values is similar (2.77).

<sup>11</sup> Based on dry soft tissue mass

<sup>12</sup> Mean of 16 separate estimates

<sup>13</sup> This estimated  $b_A$  range is likely underestimated, because it ignores the high surface area of the veliger's nutrient-absorbing, sail-shaped velum (foot) that can extend far beyond the measured shell length used in calculating  $b_L$  and  $b_A$  (see text)

<sup>14</sup> Based on wet soft tissue mass

<sup>15</sup> Similar results found for dry tissue mass and for standard metabolic rate

<sup>16</sup> Calculated from unpublished raw data.

<sup>17</sup> Each data point is a mean of 4-11 replicate measurements

<sup>18</sup> Pooled from 3 separate estimates at 3 different temperatures (24, 26 and 28° C)

<sup>19</sup> Mean of 2 separate estimates (including males versus females)

<sup>20</sup> Pooled from 4 separate estimates at 4 different temperatures (22, 24, 26 and 28° C)

<sup>21</sup> Based on carbon mass

<sup>22</sup> Similar results found for dry mass, carbon mass and ash-free dry mass



## Sources:

- Båmstedt U, Lane J, Martinussen MB. 1999 Bioenergetics of ephyra larvae of the scyphozoan jellyfish *Aurelia aurita* in relation to temperature and salinity. *Mar. Biol.* **135**, 89-98. (doi:10.1007/s002270050605)
- Cetta CM, Madin LP, Kremer P. 1986 Respiration and excretion by oceanic salps. *Mar. Biol.* **91**, 529-537. (doi:10.1007/BF00392605)
- Epp RW, Lewis WM 1979 Metabolic responses to temperature change in a tropical freshwater copepod (*Mesocyclops brasiliensis*) and their adaptive significance. *Oecologia* **42**, 123-138. (doi:10.1007/BF00344853)
- Epp RW, Lewis WM 1980 The nature and ecological significance of metabolic changes during the life history of copepods. *Ecology* **61**, 259-264. (<http://www.jstor.org/stable/1935183>)
- Feitl, KE, Millett AF, Colin SP, Dabiri JO, Costello JH. 2009 Functional morphology and fluid interactions during early development of the scyphomedusa *Aurelia aurita*. *Biol. Bull.* **217**, 283-291. (<http://www.jstor.org/stable/20617029>)
- Finenko, GA, Anninsky BE, Romanova ZA, Abolmasova GI, Kideys AE. 2001 Chemical composition, respiration and feeding rates of the new alien ctenophore, *Beroe ovata*, in the Black Sea. *Hydrobiologia* **451**, 177-186. (doi:10.1023/A:1011819819448)
- Frandsen KT, Riisgård HU. 1997 Size dependent respiration and growth of jellyfish, *Aurelia aurita*. *Sarsia* **82**, 307-312. (doi:10.1080/00364827.1997.10413659)
- Gangnery A, Chabirand J-M, Lagarde F, Le Gall P, Oheix J, Bacher C, Buestel D. 2003 Growth model of the Pacific oyster, *Crassostrea gigas*, cultured in Thau Lagoon (Méditerranée, France). *Aquaculture* **215**, 267-290. (doi.org/10.1016/S0044-8486(02)00351-4)
- Gerdes D. 1983 The Pacific oyster *Crassostrea gigas*. Part II. Oxygen consumption of larvae and adults. *Aquaculture* **31**, 221-231. (doi.org/10.1016/0044-8486(83)90314-9)
- Hamburger K, Møhlenberg F, Randløv A, Riisgård HU. 1983 Size, oxygen consumption and growth in the mussel *Mytilus edulis*. *Mar. Biol.* **75**, 303-306. (doi:10.1007/BF00406016)
- Hirst AG, Lucas CH. 1998 Salinity influences body weight quantification in the scyphomedusa *Aurelia aurita*: important implications for body weight determination in gelatinous zooplankton. *Mar. Ecol. Progr. Ser.* **165**, 259-269. (doi:10.3354/meps165259)
- Iguchi N, Ikeda T. 2004 Metabolism and elemental composition of aggregate and solitary forms of *Salpa thompsoni* (Tunicata: Thaliacea) in waters off the Antarctic Peninsula during austral summer 1999. *J. Plankton Res.* **26**, 1025-1037. (doi: 10.1093/plankt/fbh093)
- Jensen MA, Fitzgibbon QP, Carter CG, Adams LR. 2013a Effect of body mass and activity on the metabolic rate and ammonia-N excretion of the spiny lobster *Sagmariasus verreauxi* during ontogeny. *Comp. Biochem. Physiol., Part A* **166**, 191-198. (doi.org/10.1016/j.cbpa.2013.06.003)
- Jensen MA, Fitzgibbon QP, Carter CG, Adams LR. 2013b The effect of stocking density on growth, metabolism and ammonia-N excretion during larval ontogeny of the spiny lobster *Sagmariasus verreauxi*. *Aquaculture* **376-379**, 45-53. (doi.org/10.1016/j.aquaculture.2012.10.033)
- Jespersen H, Olsen K. 1982 Bioenergetics in veliger larvae of *Mytilus edulis* L. *Ophelia* **21**, 101-113. (doi:10.1080/00785236.1982.10426580)

- Kinoshita J, Hiromi J, Kadota S. 1997 Do respiratory metabolic rates of the scyphomedusa *Aurelia aurita* scale isometrically throughout ontogeny in a sexual generation? *Hydrobiologia* **347**, 51-55. (doi:10.1023/A:1002942806113)
- McHenry MJ, Jed J. 2003 The ontogenetic scaling of hydrodynamics and swimming performance in jellyfish (*Aurelia aurita*). *J. Exp. Biol.*, **206**, 4125-4137. (doi:10.1242/jeb.00649)
- Møller LF, Riisgård HU. 2007 Respiration in the scyphozoan jellyfish *Aurelia aurita* and two hydromedusae (*Sarsia tubulosa* and *Aequorea vitrina*): effect of size, temperature and growth. *Mar. Ecol. Progr. Ser.* **330**, 149-154. (doi:10.3354/meps330149)
- Sprung M. 1984 Physiological energetics of mussel larvae (*Mytilus edulis*). III. Respiration. *Mar Ecol. Progr. Ser.* **18**, 171-178.
- Shiganova TA, Bulgakova YV, Volovik SP, Mirzoyan ZA, Dudkin SI. 2001 The new invader *Beroe ovata* Mayer 1912 and its effect on the ecosystem in the northeastern Black Sea. *Hydrobiologia* **451**, 187-197. (doi:10.1023/A:1011823903518)
- Svetlichny LS, Abolmasova GI, Hubareva ES, Finenko GA, Bat, L, Kideys AE. 2004 Respiration rates of *Beroe ovata* in the Black Sea. *Mar. Biol.* **145**, 585-593. (doi:10.1007/s00227-004-1336-4)
- Zotin AA, Ozernyuk ND. 2004a Age-related changes in oxygen consumption in the edible mussel *Mytilus edulis* from the White Sea. *Biol. Bull. Russ. Acad. Sci.* **31**, 465-468. (doi:10.1023/B:BIBU.0000043772.49729.c9)
- Zotin AA, Ozernyuk ND. 2004b Growth characteristics of the common mussel *Mytilus edulis* from the White Sea. *Biol. Bull. Russ. Acad. Sci.* **31**, 377-381. (doi:10.1023/B:BIBU.0000036942.56020.d2)

### 3. Sources for data in Table 2

#### Nauplii $b_L$ :

- Almeda R, Calbet A, Alcaraz M, Yebra L, Saiz E. 2010 Effects of temperature and food concentration on the survival, development and growth rate of naupliar stages of *Oithona davisae* (Copepoda, Cyclopoida) *Mar. Ecol. Progr. Ser.* **410**, 97-109. (doi:10.3354/meps08625)
- Berggreen U, Hansen B, Kiorboe T. 1988 Food size spectra, ingestion and growth of the copepod *Acartia tonsa* during development: implications for determination of copepod production. *Mar. Biol.* **99**, 341-352. (doi:10.1007/BF02112126)
- Durbin EG, Durbin AG. 1978. Length and weight relationships of *Acartia clausi* from Narragansett Bay, R.I. *Limnol. Oceanogr.* **23**, 958-969.
- Hay SJ, Kiorboe T, Matthews A. 1991 Zooplankton biomass and production in the North Sea during the Autumn Circulation Experiment, October 1987-1988. *Cont. Shelf Res.* **11**, 1453-1476. (doi.org/10.1016/0278-4343(91)90021-W)
- Jerling HL, Wooldridge TH. 1991 Population dynamics and estimates of production for the calanoid copepod *Pseudodiaptomus hessei* in a warm temperate estuary. *Est. Coast. Shelf Sci.* **33**, 121-135. (doi.org/10.1016/0272-7714(91)90002-S)

- Kang H-K, Kang YJ. 1997 Length and weight relationship of *Acartia steueri* (Copepoda: Calanoida) in Ilkwang Bay, Korea. *J. Korean Fish. Soc.* **30**, 906-908.
- Kimoto K, Uye S-I, Onbe T. 1986 Growth characteristics of a brackish-water calanoid copepod *Sinocalanus tenellus* in relation to temperature and salinity. *Bull. Plankton Soc. Japan* **33**, 43-57.
- Klein Breteler WCM, Framsz HG, Gonzalez SR. 1982 Growth and development of four calanoid copepod species under experimental and natural conditions. *Neth. J. Sea Res.* **16**, 195-207. (doi.org/10.1016/0077-7579(82)90030-8)
- Landry M. 1976 *Population dynamics of the planktonic marine copepod, Acartia clausi Giesbrecht, in a small temperate lagoon*. Doctoral dissertation. Seattle, Washington, USA: University of Washington.
- Lee H-W, Ban S, Ikeda T, Matsuishi T. 2003 Effect of temperature on development, growth and reproduction in the marine copepod *Pseudocalanus newmanii* at satiating food conditions. *J. Plankton Res.* **25**, 261-271. (doi:10.1093/plankt/25.3.261)
- Liang D, Uye S. 1996 Population dynamics and production of the planktonic copepods in a eutrophic inlet of the Inland Sea of Japan. II. *Acartia omorii*. *Mar. Biol.* **125**, 109-117. (doi:10.1007/BF00350765)
- Liang D, Uye S, Onbe T. 1996 Population dynamics and production of the planktonic copepods in a eutrophic inlet of the Inland Sea of Japan. I. *Centropages abdominalis*. *Mar. Biol.* **124**, 527-536. (doi:10.1007/BF00351034)
- Tanskanen S. 1994 Seasonal variability in the individual carbon content of the calanoid copepod *Acartia bifilosa* from the northern Baltic Sea. *Hydrobiologia* **292/293**, 397-403. (doi:10.1007/BF00229965)
- Uye S-I. 1982b Population dynamics and production of *Acartia clausi* Giesbrecht (Copepoda: Calanoida) in inlet waters. *J. Exp. Mar. Biol. Ecol.* **57**, 55-83. (doi.org/10.1016/0022-0981(82)90144-7)
- Uye S., Iwai Y, Kasahara S. 1983 Growth and production of the inshore marine copepod *Pseudodiaptomus marinus* in the Central part of the Inland Sea of Japan. *Mar. Biol.* **73**, 91-98. (doi:10.1007/BF00396289)
- Uye S-I. 1988 Temperature-dependent development and growth of *Calanus sinicus* (Copepoda: Calanoida) in the laboratory. *Hydrobiologia* **167/168**, 285-293. (doi:10.1007/BF00026316)
- Uye S-I. 1991 Temperature-dependent development and growth of the planktonic copepod *Paracalanus* sp. in the laboratory. *Bull. Plankton Soc. Japan Spec. Vol.*, 627-636.

### Nauplii $b_R$ :

- Epp RW, Lewis WM 1980 The nature and ecological significance of metabolic changes during the life history of copepods. *Ecology* **61**, 259-264. (<http://www.jstor.org/stable/1935183>)
- Hamburger K, Boetius F. 1987 Ontogeny of growth, respiration and feeding rate of the freshwater calanoid copepod *Eudiaptomus graciloides*. *J. Plankton Res.* **9**, 589-606. (doi:10.1093/plankt/9.4.589)
- Vidal J. 1980 Physioecology of zooplankton. III. Effects of phytoplankton concentration, temperature, and body size on the metabolic rate of *Calanus pacificus*. *Mar. Biol.* **56**, 195-202. (doi:10.1007/BF00397129)
- Vidal J, Whittedge TE. 1982 Rates of metabolism of planktonic crustaceans as related to body weight and temperature of habitat. *J. Plankton Res.* **4**, 77-84. (doi:10.1093/plankt/4.1.77)

### Copepodites/adults $b_L$ :

- Almeda R, Calbet A, Alcaraz M, Yebra L, Saiz E. 2010 Effects of temperature and food concentration on the survival, development and growth rate of naupliar stages of *Oithona davisae* (Copepoda, Cyclopoida) *Mar. Ecol. Prog. Ser.* **410**, 97-109. (doi:10.3354/meps08625)
- Berggreen U, Hansen B, Kiorboe T. 1988 Food size spectra, ingestion and growth of the copepod *Acartia tonsa* during development: implications for determination of copepod production. *Mar. Biol.* **99**, 341-352. (doi:10.1007/BF02112126)
- Durbin EG, Durbin AG. 1978. Length and weight relationships of *Acartia clausi* from Narragansett Bay, R.I. *Limnol. Oceanogr.* **23**, 958-969.
- Hay SJ, Kiorboe T, Matthews A. 1991 Zooplankton biomass and production in the North Sea during the Autumn Circulation Experiment, October 1987-1988. *Cont. Shelf Res.* **11**, 1453-1476. (doi.org/10.1016/0278-4343(91)90021-W)
- Jerling HL, Wooldridge TH. 1991 Population dynamics and estimates of production for the calanoid copepod *Pseudodiaptomus hessei* in a warm temperate estuary. *Est. Coast. Shelf Sci.* **33**, 121-135. (doi.org/10.1016/0272-7714(91)90002-S)
- Kang H-K, Kang YJ. 1997 Length and weight relationship of *Acartia steueri* (Copepoda: Calanoida) in Ilkwang Bay, Korea. *J. Korean Fish. Soc.* **30**, 906-908.
- Kimoto K, Uye S-I, Onbe T. 1986 Growth characteristics of a brackish-water calanoid copepod *Sinocalanus tenellus* in relation to temperature and salinity. *Bull. Plankton Soc. Japan* **33**, 43-57.
- Klein Breteler WCM, Framsz HG, Gonzalez SR. 1982 Growth and development of four calanoid copepod species under experimental and natural conditions. *Neth. J. Sea Res.* **16**, 195-207. (doi.org/10.1016/0077-7579(82)90030-8)
- Landry M. 1976 *Population dynamics of the planktonic marine copepod, Acartia clausi Giesbrecht, in a small temperate lagoon*. Doctoral dissertation. Seattle, Washington, USA: University of Washington.
- Lee H-W, Ban S, Ikeda T, Matsuishi T. 2003 Effect of temperature on development, growth and reproduction in the marine copepod *Pseudocalanus newmanii* at satiating food conditions. *J. Plankton Res.* **25**, 261-271. (doi:10.1093/plankt/25.3.261)
- Liang D, Uye S. 1996 Population dynamics and production of the planktonic copepods in a eutrophic inlet of the Inland Sea of Japan. II. *Acartia omorii*. *Mar. Biol.* **125**, 109-117. (doi:10.1007/BF00350765)
- Tanskanen S. 1994 Seasonal variability in the individual carbon content of the calanoid copepod *Acartia bifilosa* from the northern Baltic Sea. *Hydrobiologia* **292/293**, 397-403. (doi:10.1007/BF00229965)
- Uye S-I. 1982a Length-weight relationships of important zooplankton from the Inland Sea of Japan. *J. Oceanogr. Soc. Japan* **38**, 149-158. (doi:10.1007/BF02110286)
- Uye S-I. 1982b Population dynamics and production of *Acartia clausi* Giesbrecht (Copepoda: Calanoida) in inlet waters. *J. Exp. Mar. Biol. Ecol.* **57**, 55-83. (doi.org/10.1016/0022-0981(82)90144-7)
- Uye S., Iwai Y, Kasahara S. 1983 Growth and production of the inshore marine copepod *Pseudodiaptomus marinus* in the Central part of the Inland Sea of Japan. *Mar. Biol.* **73**, 91-98. (doi:10.1007/BF00396289)
- Uye S-I. 1988 Temperature-dependent development and growth of *Calanus sinicus* (Copepoda: Calanoida) in the laboratory. *Hydrobiologia* **167/168**, 285-293. (doi:10.1007/BF00026316)

Uye S-I. 1991 Temperature-dependent development and growth of the planktonic copepod *Paracalanus* sp. in the laboratory. *Bull. Plankton Soc. Japan Spec. Vol.*, 627-636.

Copepodites/adults  $b_R$ :

Epp RW, Lewis WM 1980 The nature and ecological significance of metabolic changes during the life history of copepods. *Ecology* **61**, 259-264. (<http://www.jstor.org/stable/1935183>)

Hamburger K, Boetius F. 1987 Ontogeny of growth, respiration and feeding rate of the freshwater calanoid copepod *Eudiaptomus graciloides*. *J. Plankton Res.* **9**, 589-606. (doi:10.1093/plankt/9.4.589)

Vidal J. 1980 Physioecology of zooplankton. III. Effects of phytoplankton concentration, temperature, and body size on the metabolic rate of *Calanus pacificus*. *Mar. Biol.* **56**, 195-202. (doi:10.1007/BF00397129)

Vidal J, Whittedge TE. 1982 Rates of metabolism of planktonic crustaceans as related to body weight and temperature of habitat. *J. Plankton Res.* **4**, 77-84. (doi:10.1093/plankt/4.1.77)
